# Supplementary material for: Magnetite-Supported Gold Nanostars for the Uptake and SERS Detection of Tetracycline
Source: Nanomaterials (Basel). 2018 Dec 27;9(1):31. doi: 10.3390/nano9010031 (PMC6359395; doi:10.3390/nano9010031)
Supplement: Supplementary file 1 [file nanomaterials-09-00031-s001.pdf]

## Supplementary Material

# Magnetite-Supported Gold Nanostars for the Uptake and SERS Detection of Tetracycline

Paula C. Pinheiro, Sara Fateixa \*, Helena I. S. Nogueira and Tito Trindade

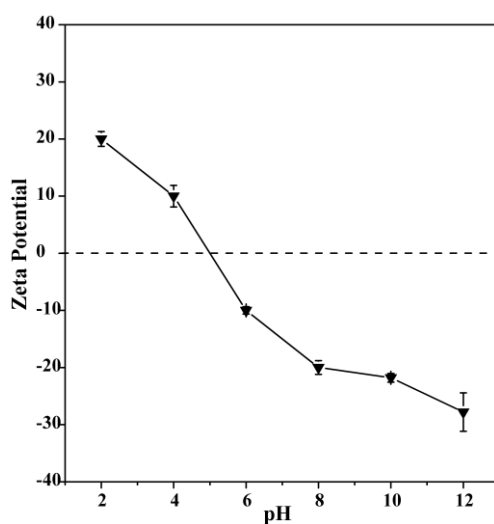

**Figure S1.** Zeta potential measurements of cubic shape magnetite particles in function of pH.

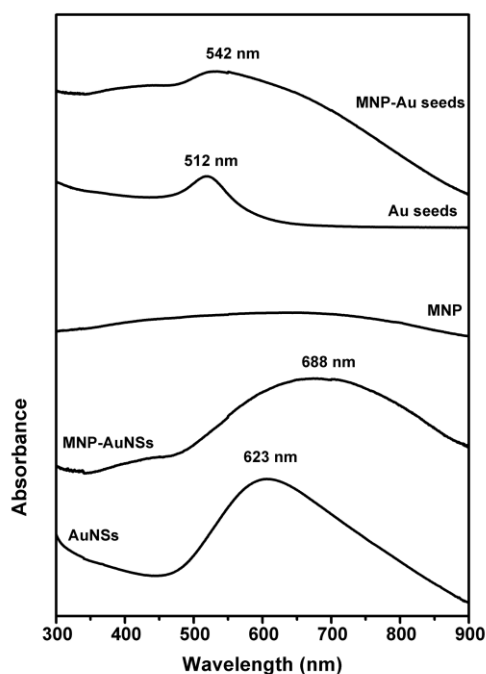

**Figure S2.** Optical spectra of MNP-Au seeds, Au seeds, MNP, MNP-Au NSs and Au NSs (supernatant).

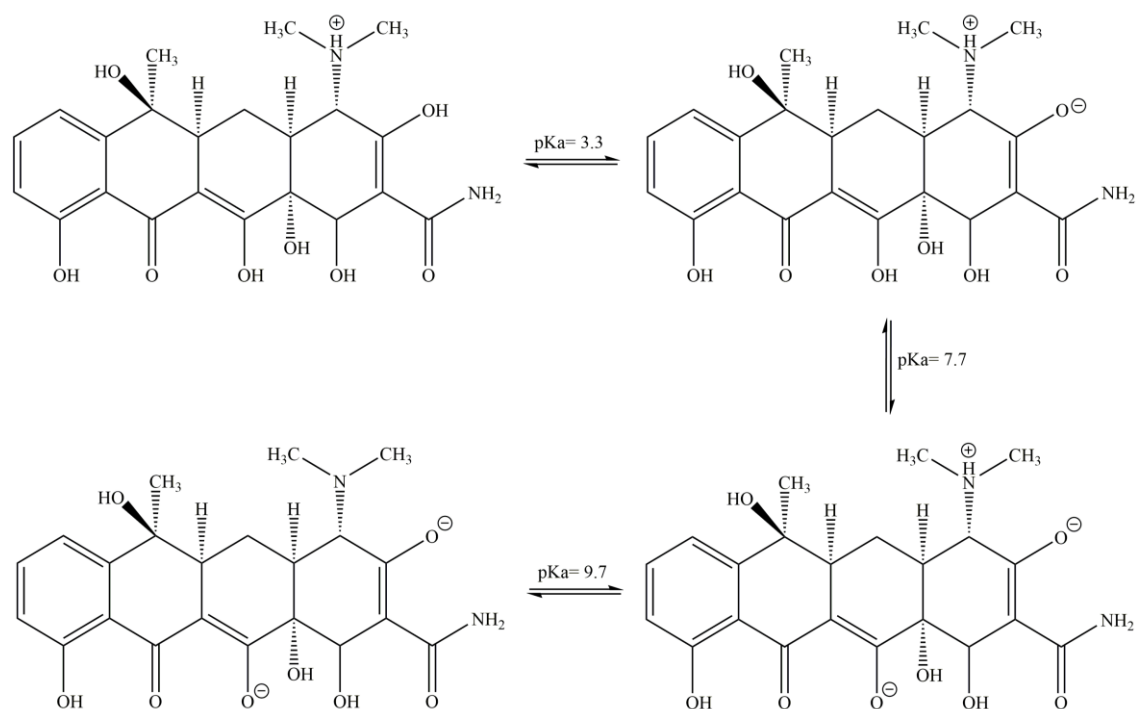

**Figure S3.** Structures and pKa values of tetracyclines.

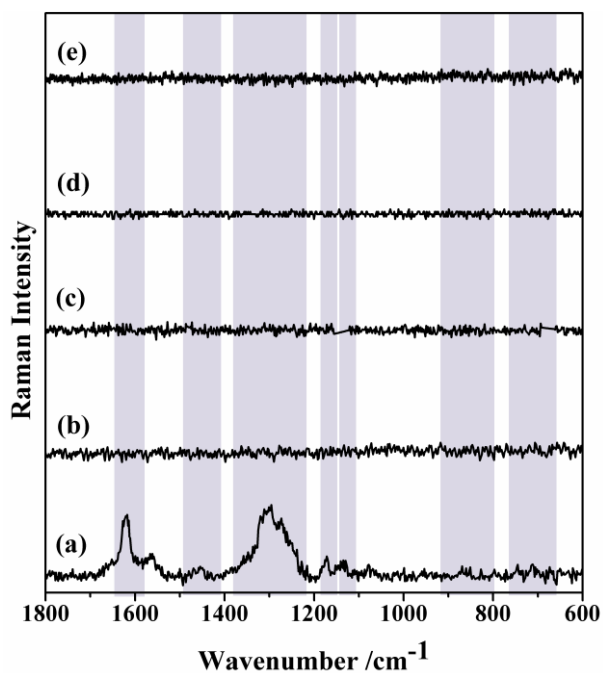

**Figure S4.** Raman spectra of (a) TC aqueous solution 0.1 M; (b) Tetracycline aqueous solution 10 μM; (c) Mag-AuNS solid substrate; (d) Fe<sub>3</sub>O<sub>4</sub> nanoparticles after contact with TC for 20 min at initial concentration 10 μM; (e) Mag-AuSeeds nanoparticles after contact with TC for 20 min at initial concentration 10 μM.

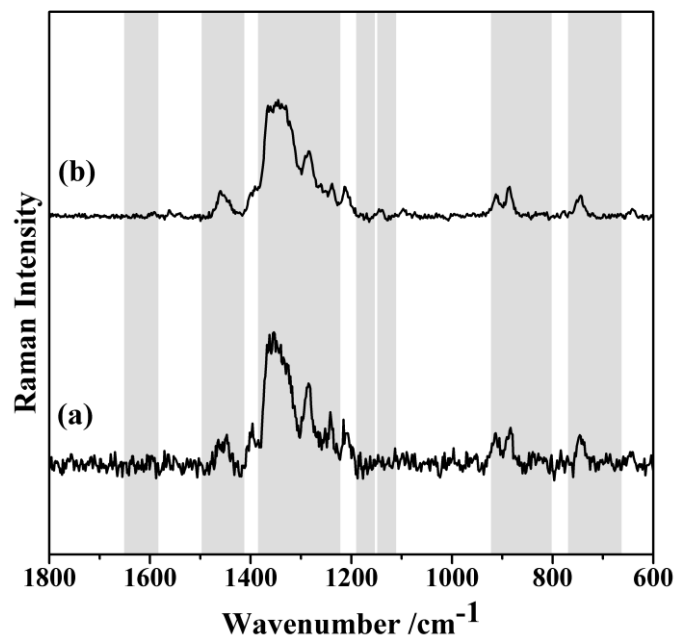

**Figure S5.** SERS spectrum for TC (10  $\mu$ M) using Mag-AuNS (a) before and (b) after magnetic concentration (excitation at 633 nm, 0.2 mW laser power). Grey shadow: characteristic Raman bands for TC powder.

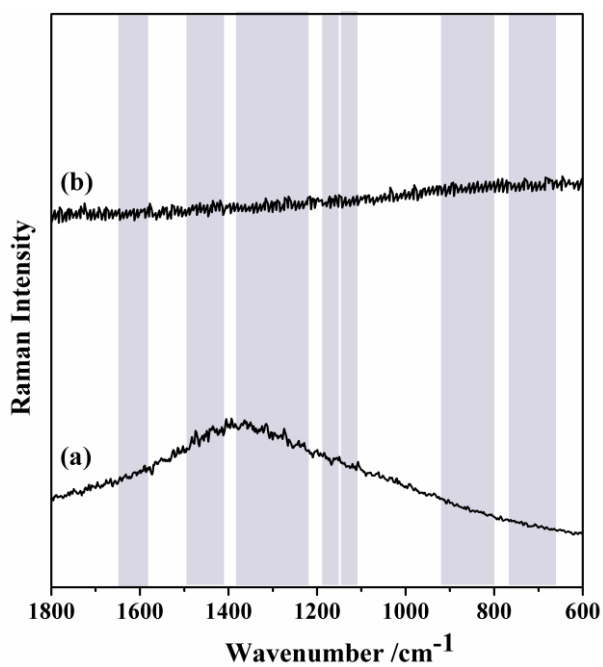

**Figure S6.** Average Raman spectra of Mag-AuNS substrate with (a) estuarine water from Aveiro lagoon (salty water) and (b) mineral water (excitation at 633 nm, 0.2 mW laser power, 22500 spectra, 0.1 s, 1 acquisition).

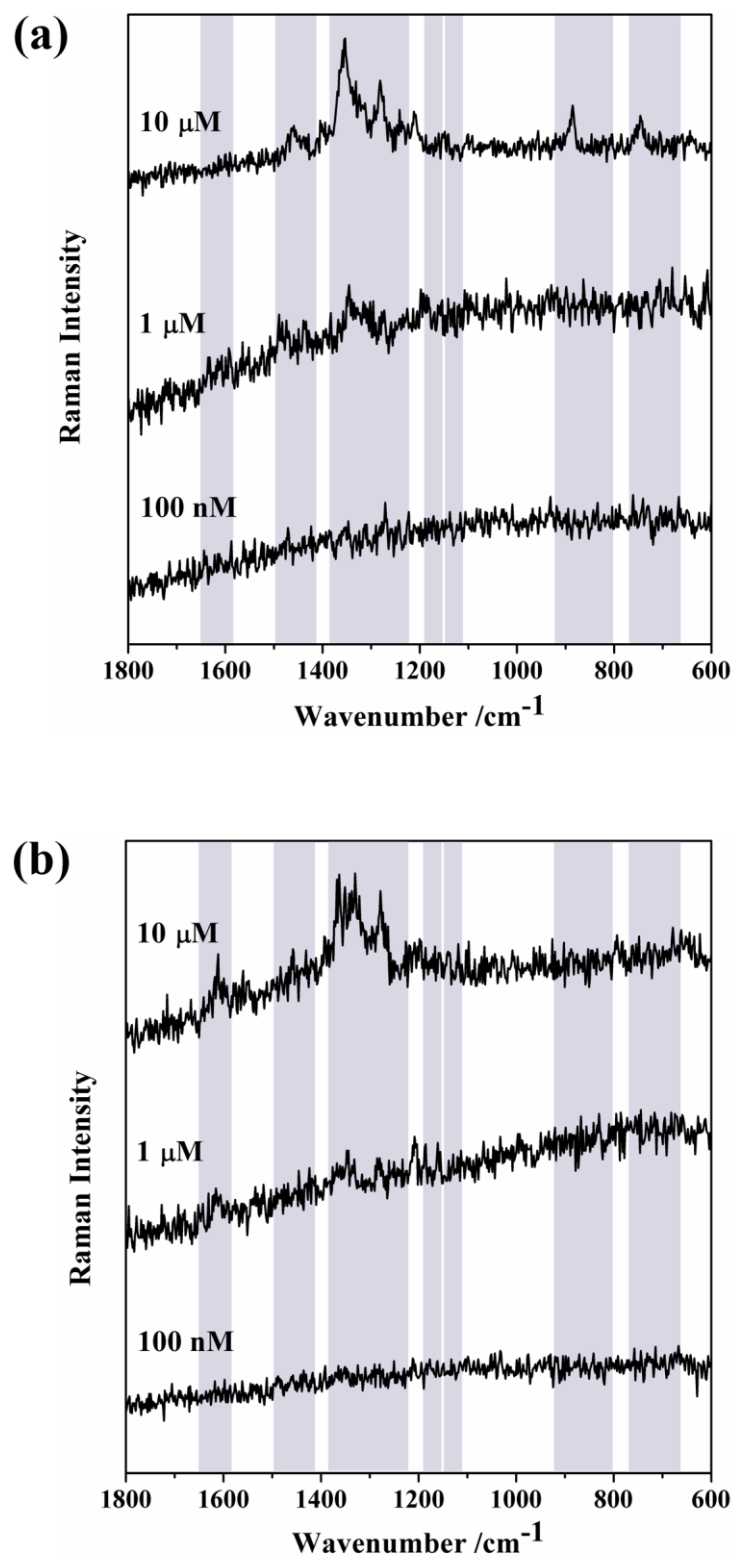

**Figure S7.** SERS spectra of TC at several concentrations using MNP-AuNS as the SERS substrate in (a) estuarine water from Aveiro lagoon and (b) mineral water.
